# Supplementary material for: Paramagnetic transition metal complexes with a redox-active ligand: M(hfac)2(EDO-EDT-TTF-py)n; [M = CuII, n= 1, 2; M = MnII, n= 2]
Source: Royal Society of Chemistry journal article supplement (doi:10.1039/b507163a), 2005-01-01
Supplement: b507163a.pdf [file b507163a.pdf]

### Supplementary data

|     | L1          | 2            | 3             | 4           |             |
|-----|-------------|--------------|---------------|-------------|-------------|
|     |             |              |               | A molecule  | B molecule  |
| C10 | -0.0217(26) | 0.0148(66)   | 0.0367(118)   | 0.0118(41)  | 0.0271(42)  |
| C11 | -0.0168(26) | 0.0113(64)   | 0.0182(117)   | -0.0002(42) | 0.0215(43)  |
| S3  | 0.0442(10)  | -0.0065(27)  | -0.0155(49)   | -0.0102(16) | -0.0099(16) |
| S4  | -0.0239(10) | -0.0072(27)  | -0.0161(49)   | 0.0019(16)  | -0.0156(16) |
| S5  | -0.0247(10) | -0.0065(26)  | -0.0121(46)   | 0.0044(16)  | -0.0146(17) |
| S6  | 0.0429(10)  | -0.0059(27)  | -0.0111(50)   | -0.0076(16) | -0.0086(16) |
| S1  | -0.7168(23) | -0.0349 (68) | -0.0215 (123) | 0.6801(37)  | 0.3728(37)  |
| S2  | -0.8953(23) | 0.1873(71)   | 0.1780(128)   | 0.6976(37)  | 0.3736(37)  |
| O1  | -0.7773(35) | -0.0299(86)  | -0.0198(148)  | 1.1910(54)  | 0.9290(59)  |
| O2  | -0.6819(35) | -0.0061(102) | -0.0193(178)  | 1.2123(51)  | 0.8870(59)  |

Figure S1. Deviation in Å of peripheral O from ethylenedioxy and S from 4-pyridylethylenedithio with respect to the TTF skeleton mean plane (S3 S4 C10 C11 S5 S6).

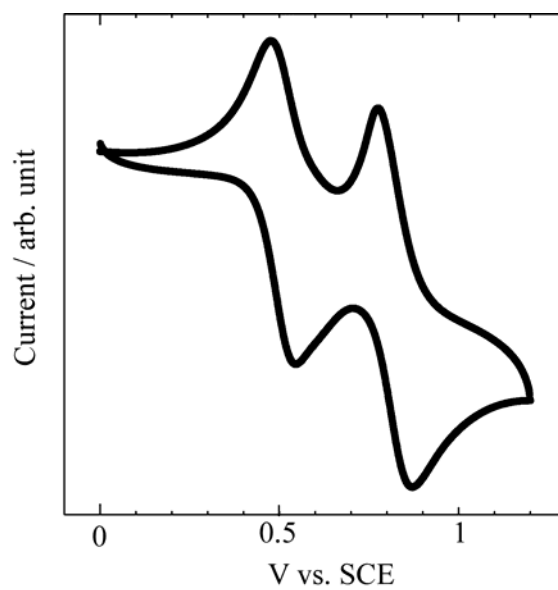

Figure S2. Chart of cyclic voltammetry for **L1**.

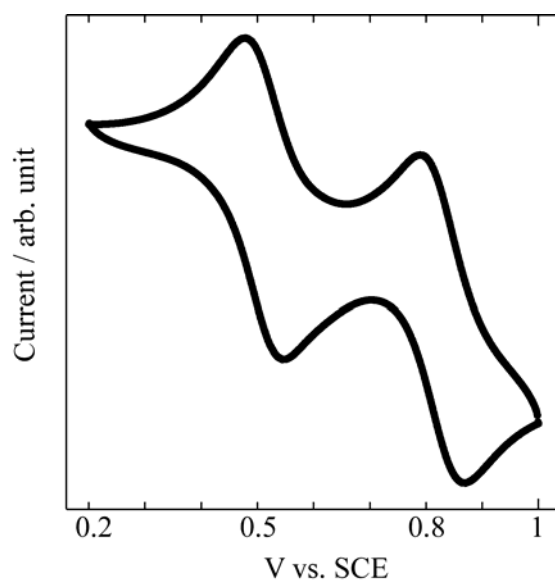

- a -

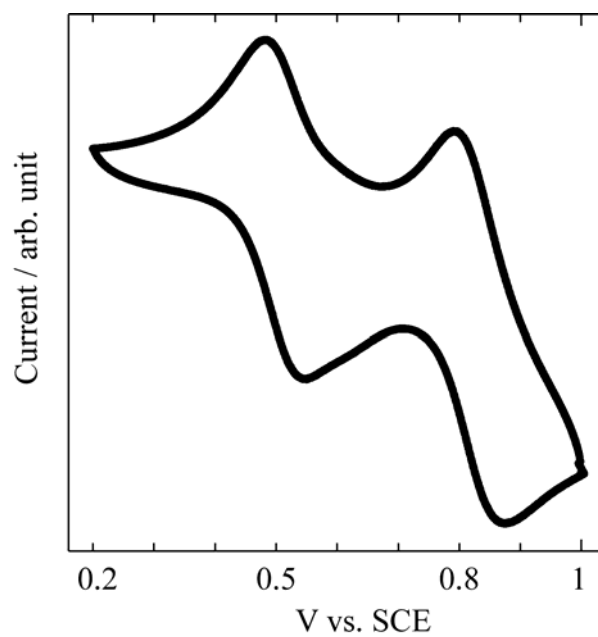

- b -

Figure S3. Charts of cyclic voltametry for **2** (a) and **3** (b).

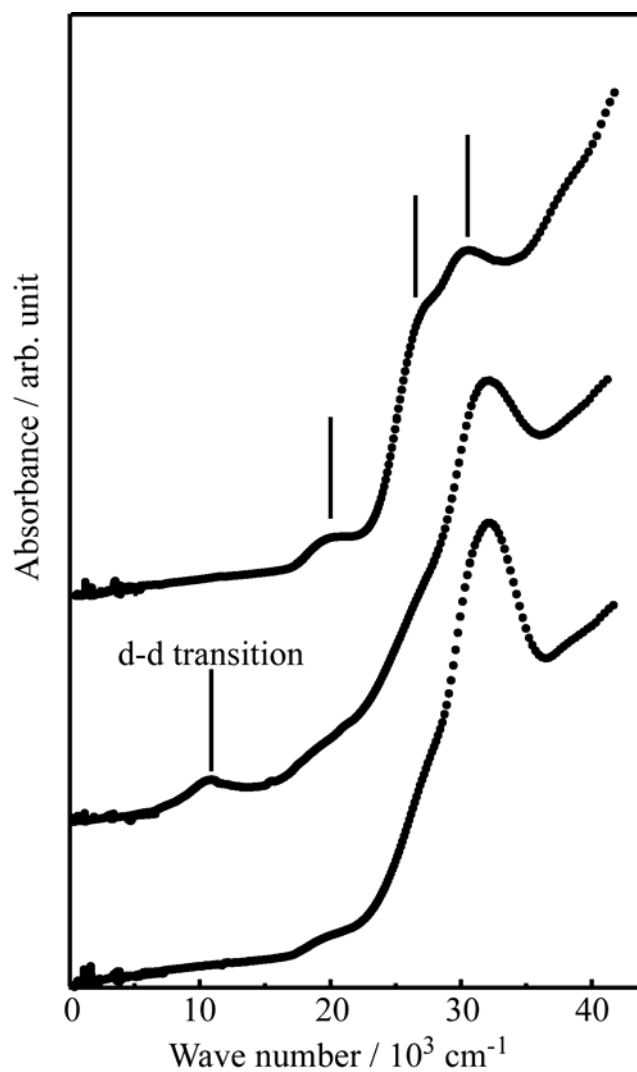

Figure S4. UV-vis-IR spectra of **L1** (up), **2** (middle), and **3** (down) in KBr disks. Bars indicate the absorption bands.

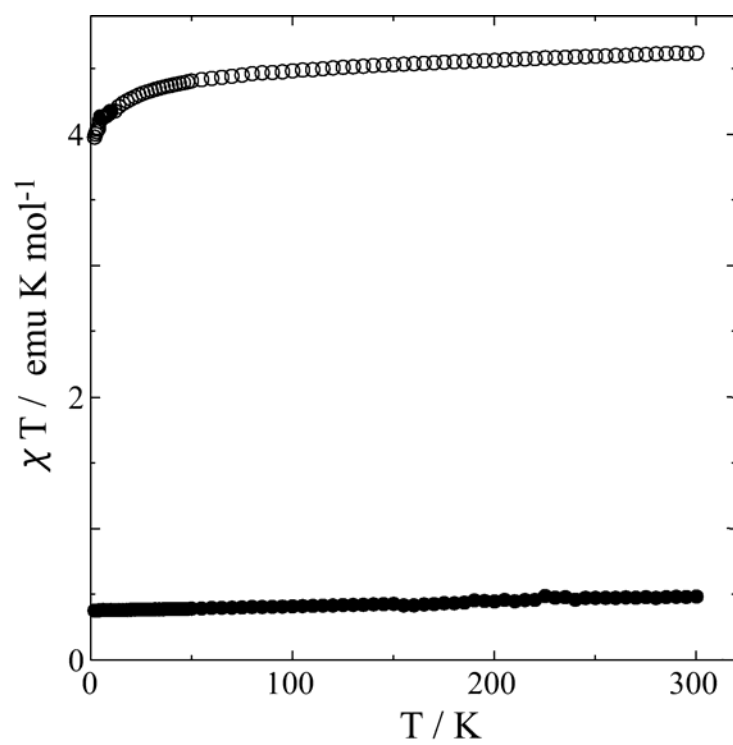

Figure S5.  $\chi T$  vs.  $T$  plots for **2** (closed circles) and **3** (open circles).

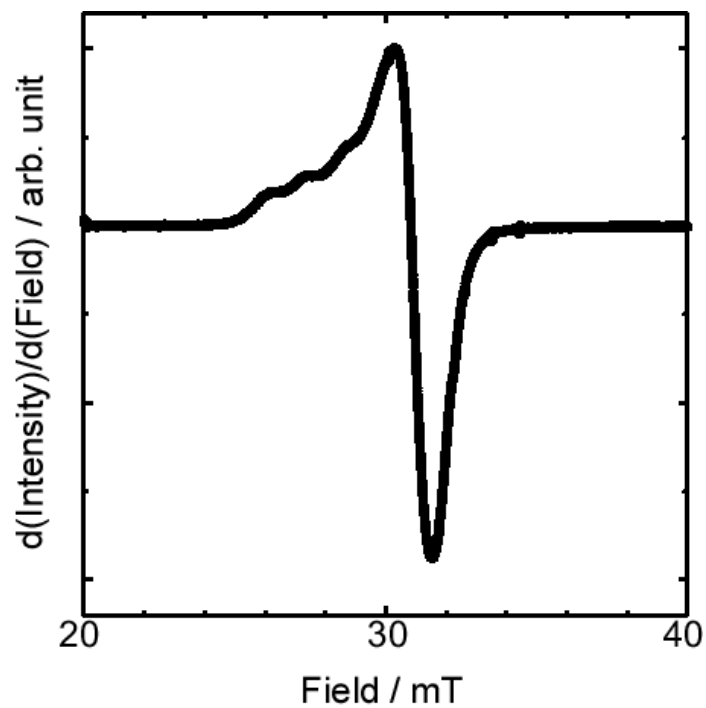

- a -

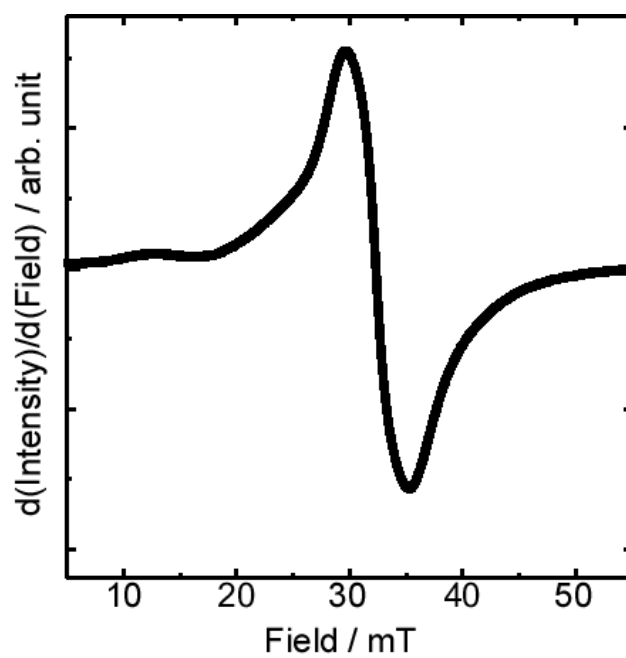

- b -

Figure S6. ESR spectra for (a) **2** and (b) **3** at room temperature.
